# Supplementary material for: Effect of perioperative goal-directed hemodynamic therapy on postoperative recovery following major abdominal surgery—a systematic review and meta-analysis of randomized controlled trials
Source: Springer Nature journal article supplement (doi:10.1186/s13054-017-1728-8), 2017-06-09
Supplement: MOESM1 [file 12355648]

|                           | Random sequence generation (selection bias) | Allocation concealment (selection bias) | Blinding of participants and personnel (performance bias) | Blinding of outcome assessment (detection bias) | Incomplete outcome data (attrition bias) | Selective reporting (reporting bias) | Other bias |
|---------------------------|---------------------------------------------|-----------------------------------------|-----------------------------------------------------------|-------------------------------------------------|------------------------------------------|--------------------------------------|------------|
| Bender et al.1997 26      | ?                                           | ?                                       | ?                                                         | ?                                               | ?                                        | ?                                    | ?          |
| Benes et al. 2010 27      | ?                                           | +                                       | +                                                         | +                                               | +                                        | ?                                    | +          |
| Bisgaard et al.2013 28    | +                                           | ?                                       | +                                                         | +                                               | +                                        | +                                    | +          |
| Bonazzi et al.2002 29     | +                                           | ?                                       | ?                                                         | ?                                               | +                                        | +                                    | +          |
| Boyd et al. 1993 30       | ?                                           | ?                                       | ?                                                         | +                                               | +                                        | +                                    | ?          |
| Brandstrup et al. 2012 11 | +                                           | +                                       | +                                                         | ?                                               | +                                        | +                                    | +          |
| Bundgaard-Nielsen 2013 63 | +                                           | +                                       | ?                                                         | ?                                               | +                                        | +                                    | ?          |
| Buttner et al.2008 31     | ?                                           | +                                       | +                                                         | +                                               | +                                        | +                                    | ?          |
| Challand et al.201127     | ?                                           | +                                       | +                                                         | +                                               | +                                        | ?                                    | +          |
| Cohn et al. 2010 47       | +                                           | ?                                       | +                                                         | +                                               | +                                        | ?                                    | +          |
| Conway et al.2002 33      | ?                                           | ?                                       | +                                                         | +                                               | +                                        | ?                                    | +          |
| Correa-Gallego 2015 12    | +                                           | ?                                       | +                                                         | +                                               | +                                        | +                                    | +          |
| Donati et al. 2007 34     | +                                           | +                                       | ?                                                         | ?                                               | +                                        | ?                                    | ?          |
| Forget et al.2010 35      | ?                                           | ?                                       | +                                                         | +                                               | +                                        | ?                                    | +          |
| Gan et al. 2002 36        | +                                           | +                                       | +                                                         | +                                               | +                                        | ?                                    | +          |
| Jammer et al.2010 37      | +                                           | +                                       | +                                                         | +                                               | +                                        | +                                    | +          |
| Jhanji et al. 2010 38     | +                                           | +                                       | +                                                         | +                                               | +                                        | ?                                    | +          |
| Jones et al.2013 39       | +                                           | ?                                       | ?                                                         | ?                                               | +                                        | +                                    | ?          |
| Lopes et al.2007 40       | ?                                           | +                                       | +                                                         | +                                               | +                                        | ?                                    | +          |
| Mayer et al. 2010 41      | ?                                           | +                                       | +                                                         | +                                               | +                                        | ?                                    | ?          |
| Mckenny et al.2013 62     | +                                           | +                                       | ?                                                         | ?                                               | +                                        | +                                    | ?          |
| Noblett et al.2005 42     | ?                                           | ?                                       | +                                                         | ?                                               | +                                        | ?                                    | +          |
| Pearse et al. 2005 43     | +                                           | +                                       | +                                                         | +                                               | +                                        | ?                                    | +          |
| Pearse et al.2014 1       | +                                           | +                                       | +                                                         | +                                               | +                                        | +                                    | +          |
| Pestana et al. 2014 13    | +                                           | +                                       | +                                                         | +                                               | +                                        | +                                    | +          |
| Phan et al. 2014 14       | +                                           | ?                                       | +                                                         | ?                                               | +                                        | ?                                    | ?          |
| Phillai et al. 2009 44    | ?                                           | ?                                       | +                                                         | +                                               | +                                        | ?                                    | ?          |
| Ramsingh et al.2013 45    | +                                           | ?                                       | +                                                         | +                                               | +                                        | +                                    | +          |
| Salzwedel et al. 2013 61  | +                                           | +                                       | +                                                         | +                                               | +                                        | +                                    | +          |
| Sandham et al.2003 46     | +                                           | +                                       | +                                                         | +                                               | +                                        | ?                                    | +          |
| Scheeren et al.2013 65    | +                                           | +                                       | ?                                                         | +                                               | +                                        | ?                                    | +          |
| Senagore et al.2009 48    | +                                           | ?                                       | +                                                         | ?                                               | +                                        | ?                                    | +          |
| Sharkawy et al. 2013 49   | +                                           | +                                       | ?                                                         | ?                                               | +                                        | ?                                    | ?          |
| Shoemaker et al. 1988 50  | +                                           | +                                       | ?                                                         | +                                               | +                                        | ?                                    | ?          |
| Srinivasa et al. 2012 51  | +                                           | +                                       | +                                                         | ?                                               | +                                        | +                                    | +          |
| Szakmany et al. 2005 52   | +                                           | ?                                       | +                                                         | ?                                               | +                                        | ?                                    | +          |
| Ueno et al.1998 53        | +                                           | ?                                       | ?                                                         | ?                                               | +                                        | ?                                    | ?          |
| Valentine et al. 1998 54  | ?                                           | +                                       | ?                                                         | ?                                               | +                                        | ?                                    | ?          |
| Wakeling et al. 2005 55   | ?                                           | +                                       | +                                                         | ?                                               | +                                        | ?                                    | +          |
| Wilson et al. 1999 56     | +                                           | +                                       | ?                                                         | +                                               | +                                        | ?                                    | ?          |
| Yu et al.2010 57          | +                                           | +                                       | +                                                         | +                                               | +                                        | +                                    | +          |
| Zakhaleva et al. 2013 64  | +                                           | ?                                       | ?                                                         | +                                               | +                                        | ?                                    | +          |
| Zeng 2014 80              | +                                           | ?                                       | ?                                                         | ?                                               | +                                        | ?                                    | +          |
| Zhang et al. 2012 58      | +                                           | +                                       | ?                                                         | +                                               | +                                        | +                                    | +          |
| Zheng et al. 2013 59      | +                                           | +                                       | +                                                         | +                                               | +                                        | +                                    | +          |

Additional file 1: Risk of bias summary: review authors' judgements about each risk of bias item for each included study
