# Supplementary material for: Effect of perioperative goal-directed hemodynamic therapy on postoperative recovery following major abdominal surgery—a systematic review and meta-analysis of randomized controlled trials
Source: Springer Nature journal article supplement (doi:10.1186/s13054-017-1728-8), 2017-06-09
Supplement: MOESM2 [file 12355648]

|                            | $\kappa$ |
|----------------------------|----------|
| Random sequence generation | 1.00     |
| Allocation concealment     | 0.95     |
| Performance bias           | 0.90     |
| Detection bias             | 0.83     |
| Attrition bias             | 0.92     |
| Reporting bias             | 0.68     |
| Other bias                 | 0.81     |
| Overall bias               | 0.89     |

Additional file 2: Weighted Kappa Measurements to Assess Agreement Between Reviewers in Rating Quality of Methodology of Included

Trials
