# Supplementary material for: Effect of perioperative goal-directed hemodynamic therapy on postoperative recovery following major abdominal surgery—a systematic review and meta-analysis of randomized controlled trials
Source: Springer Nature journal article supplement (doi:10.1186/s13054-017-1728-8), 2017-06-09
Supplement: MOESM4 [file 12355648]

Type of patients

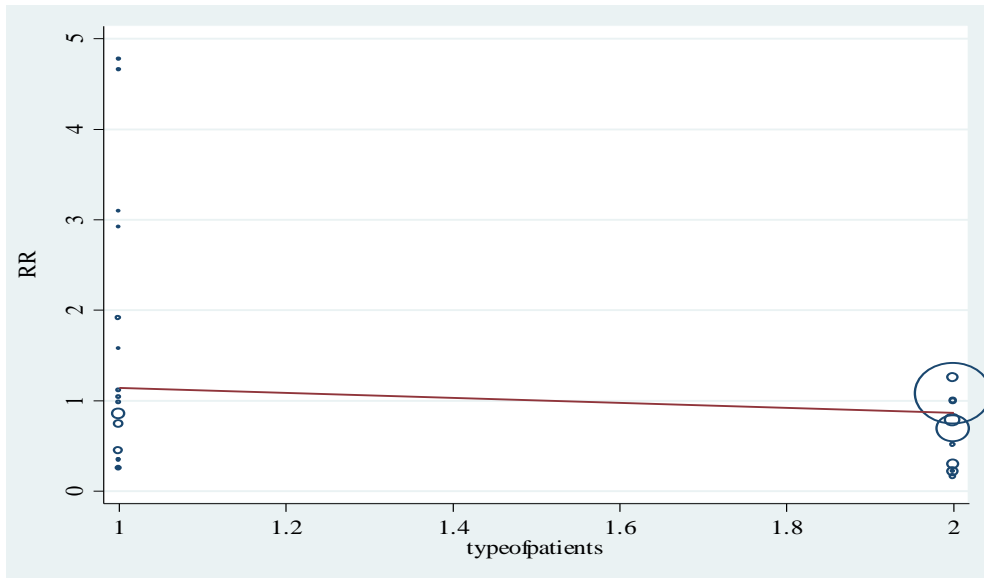

Type of monitor

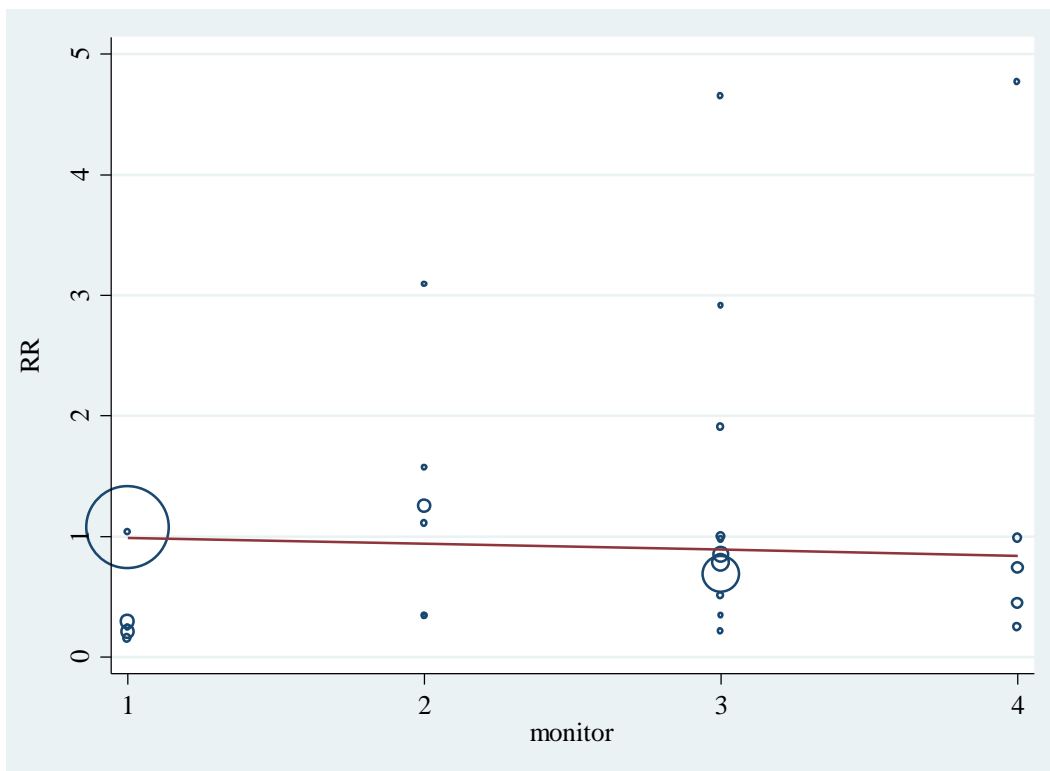

Therapeutic goal

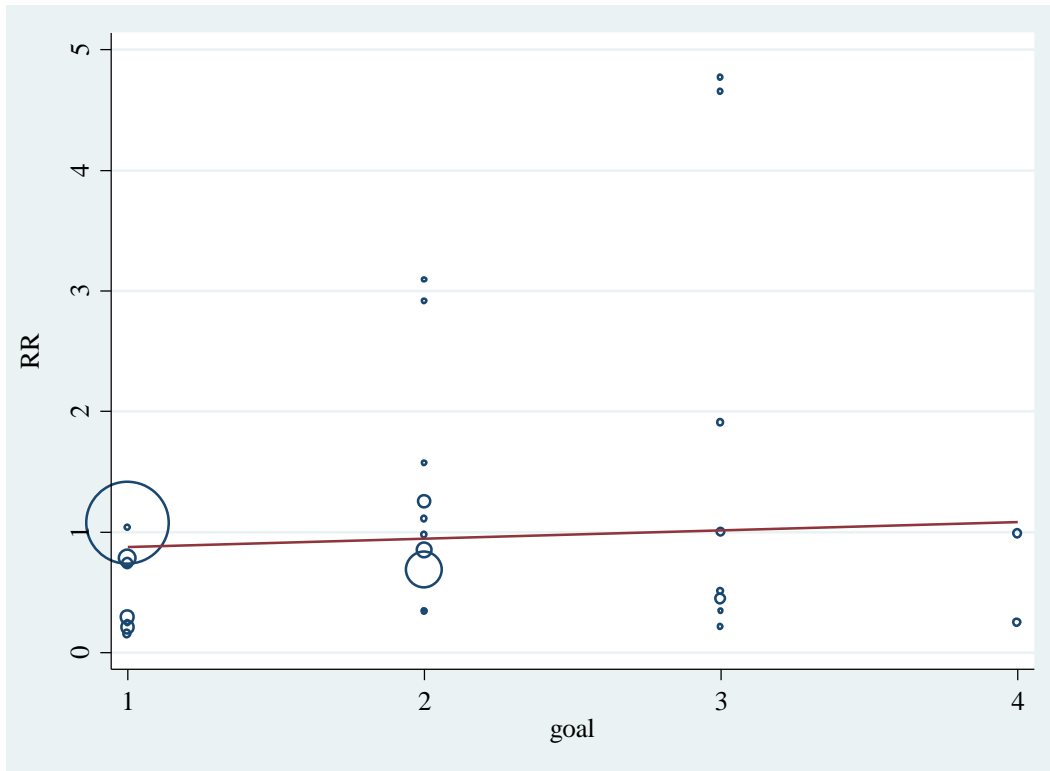

Interventions

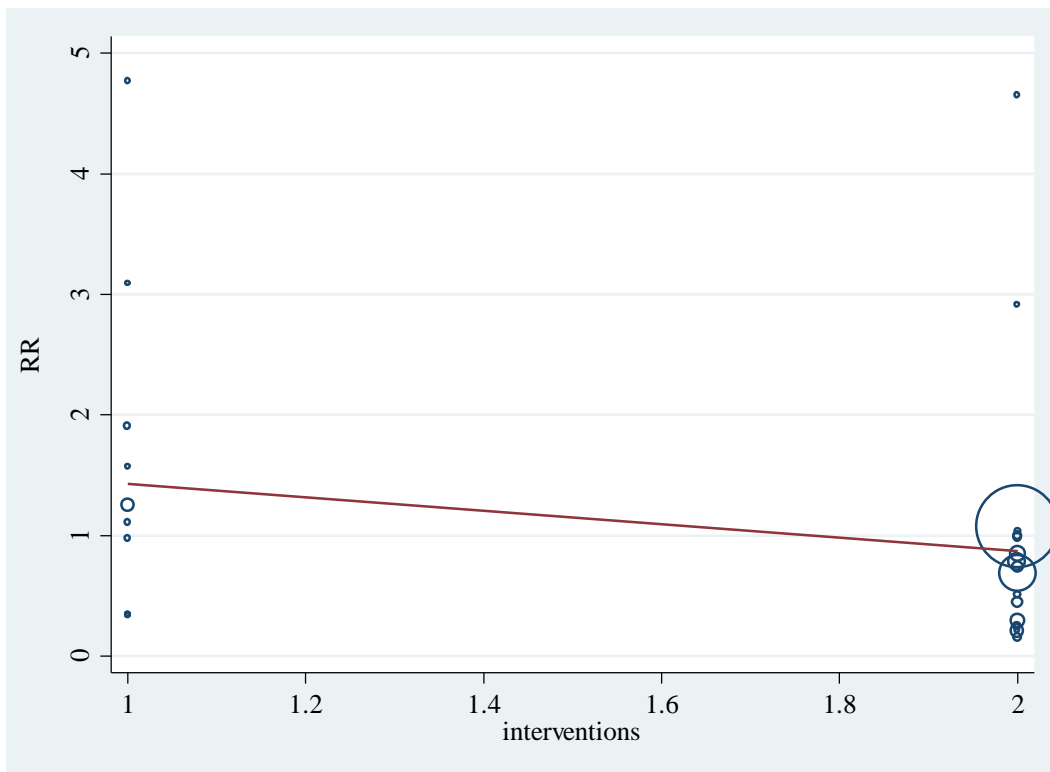

ERP

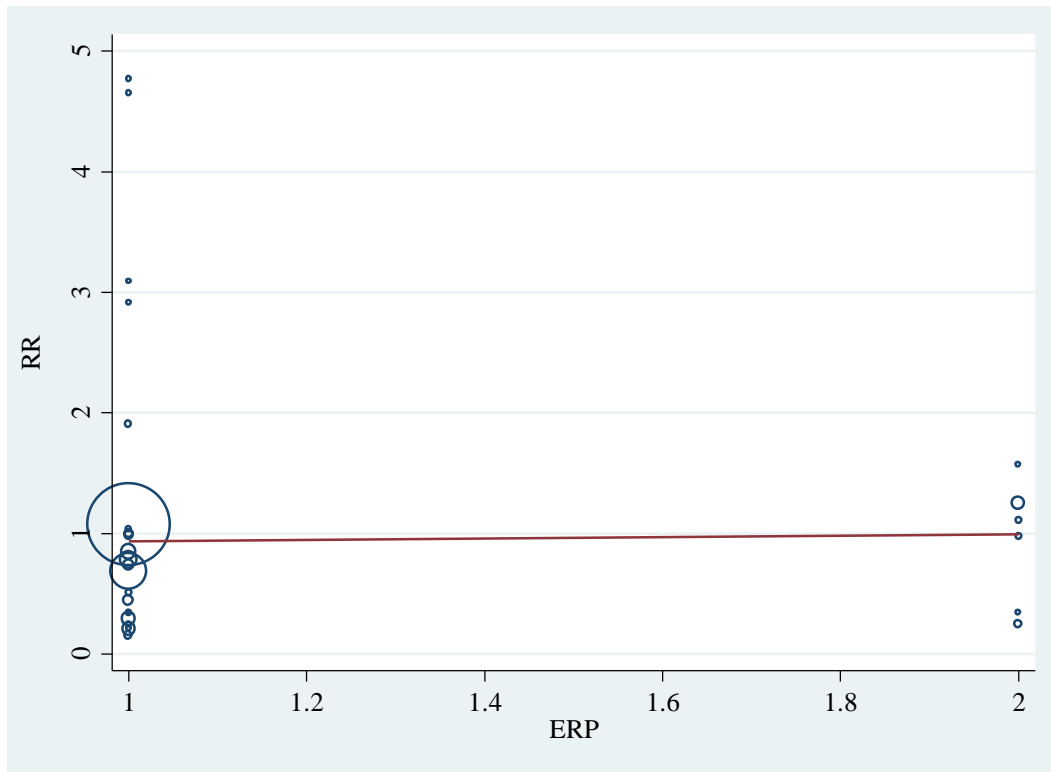

Additional file 4: Meta-regression analysis for long-term mortality based on type of patients (high-risk versus non high-risk), type of monitoring used, type of interventions (fluids versus fluids and inotropes), therapeutic goals, and whether or not in context with enhanced recovery programmes (ERP). RR: risk ratio.
