# Supplementary material for: Effect of perioperative goal-directed hemodynamic therapy on postoperative recovery following major abdominal surgery—a systematic review and meta-analysis of randomized controlled trials
Source: Springer Nature journal article supplement (doi:10.1186/s13054-017-1728-8), 2017-06-09
Supplement: MOESM6 [file 12355648]

Type of patients

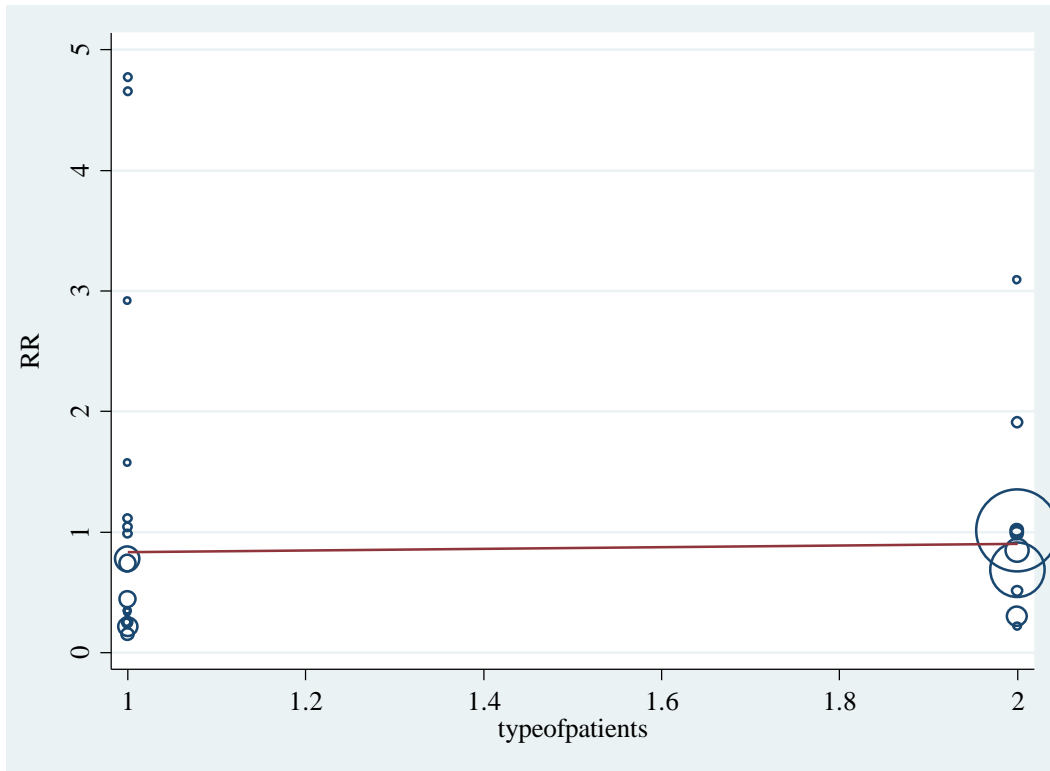

Type of monitor

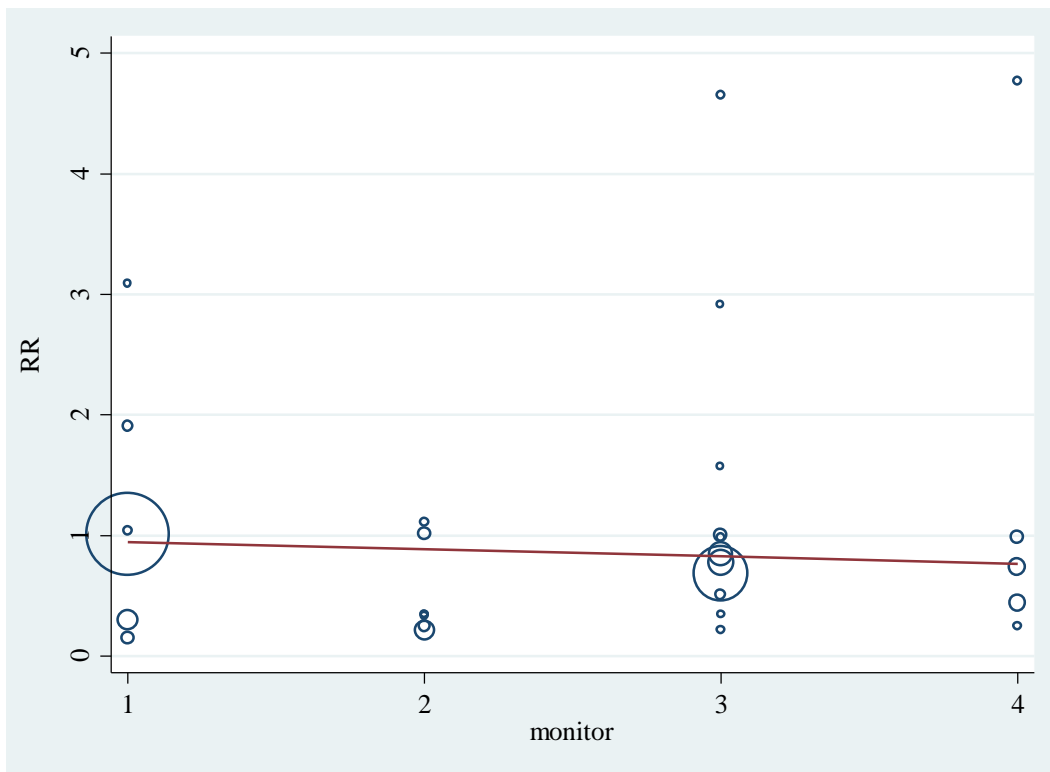

### Therapeutic goal

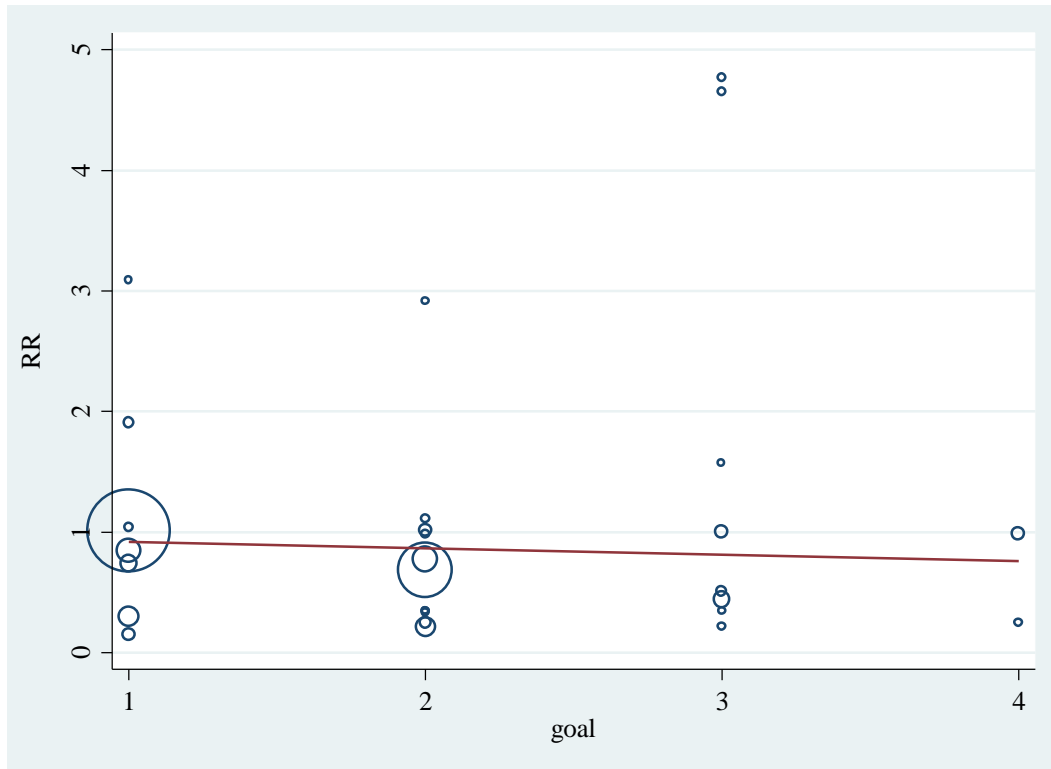

### Type of interventions

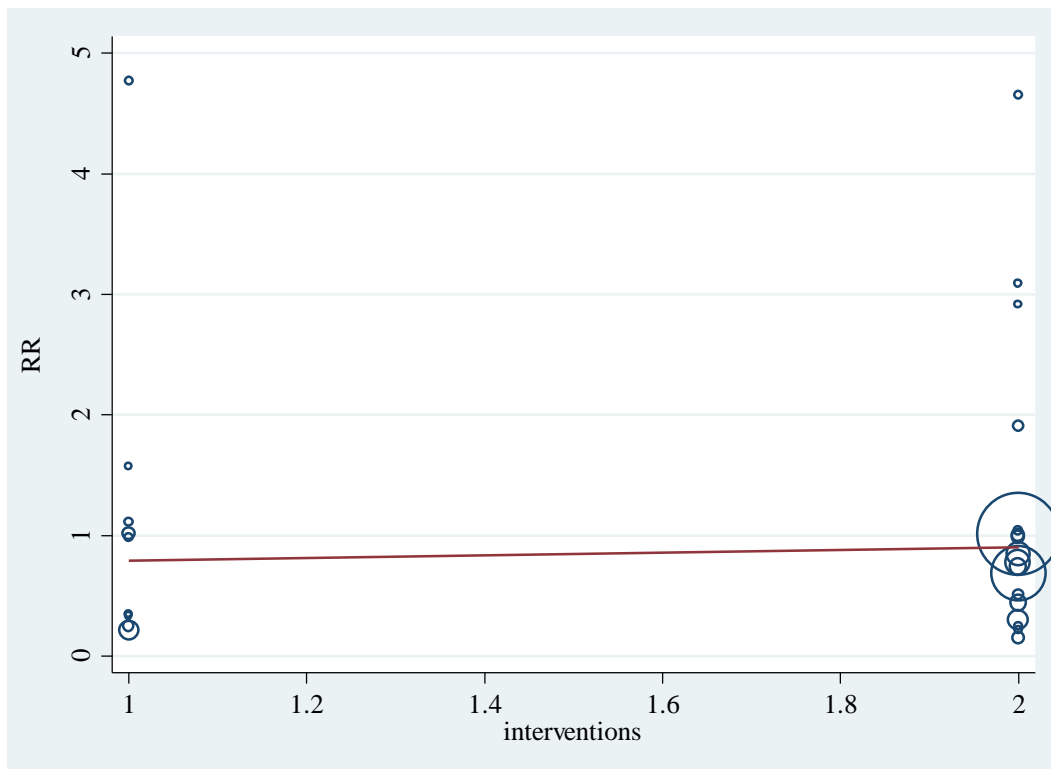

ERP

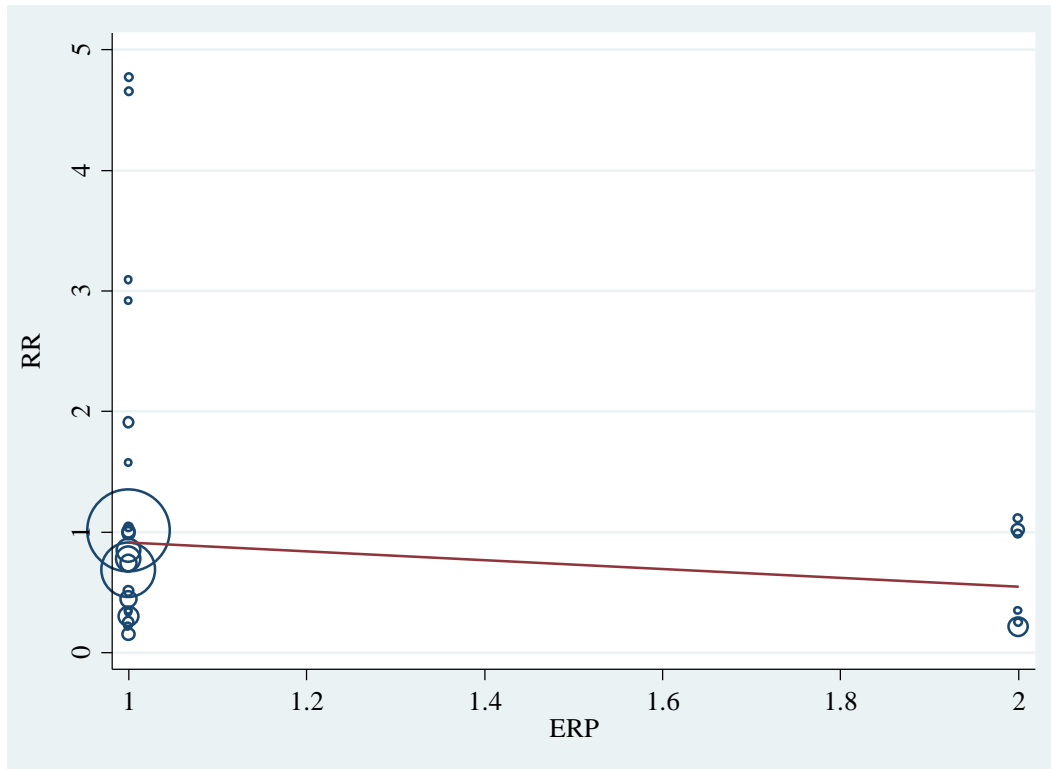

Additional file 6 : Meta-regression analysis for short-term mortality. ERP: enhanced recovery programmes.
