# Supplementary material for: Effect of perioperative goal-directed hemodynamic therapy on postoperative recovery following major abdominal surgery—a systematic review and meta-analysis of randomized controlled trials
Source: Springer Nature journal article supplement (doi:10.1186/s13054-017-1728-8), 2017-06-09
Supplement: MOESM7 [file 12355648]

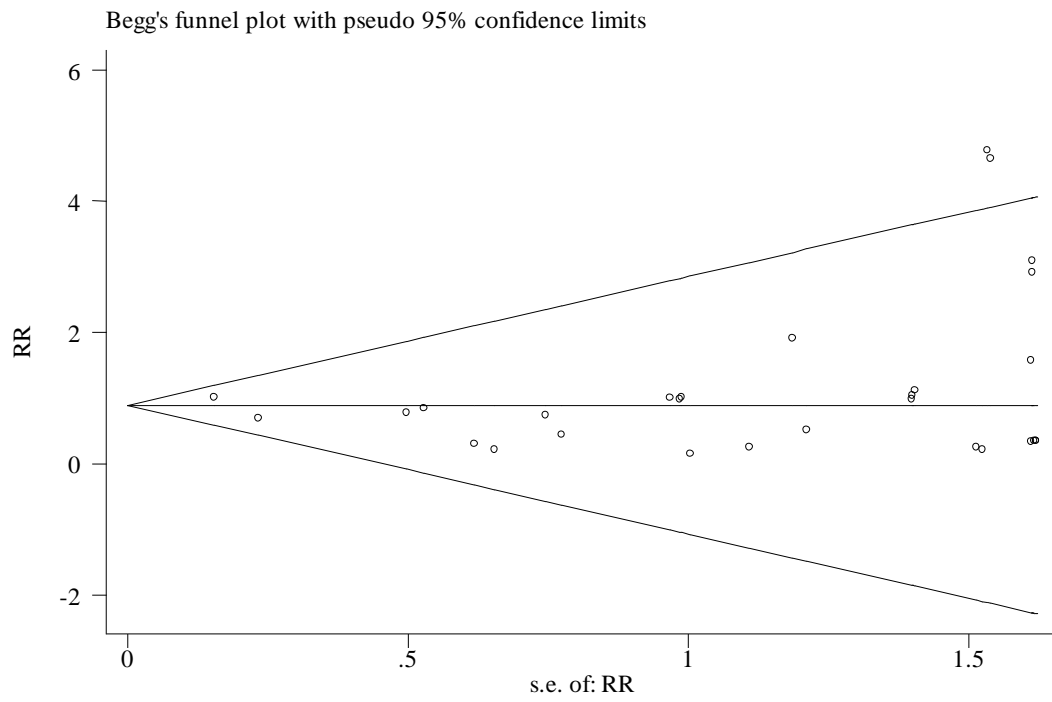

Additional file 7: Publication funnel plots for short-term mortality. RR: risk ratio
