# Supplementary material for: Effect of perioperative goal-directed hemodynamic therapy on postoperative recovery following major abdominal surgery—a systematic review and meta-analysis of randomized controlled trials
Source: Springer Nature journal article supplement (doi:10.1186/s13054-017-1728-8), 2017-06-09
Supplement: MOESM8 [file 12355648]

### Type of patients

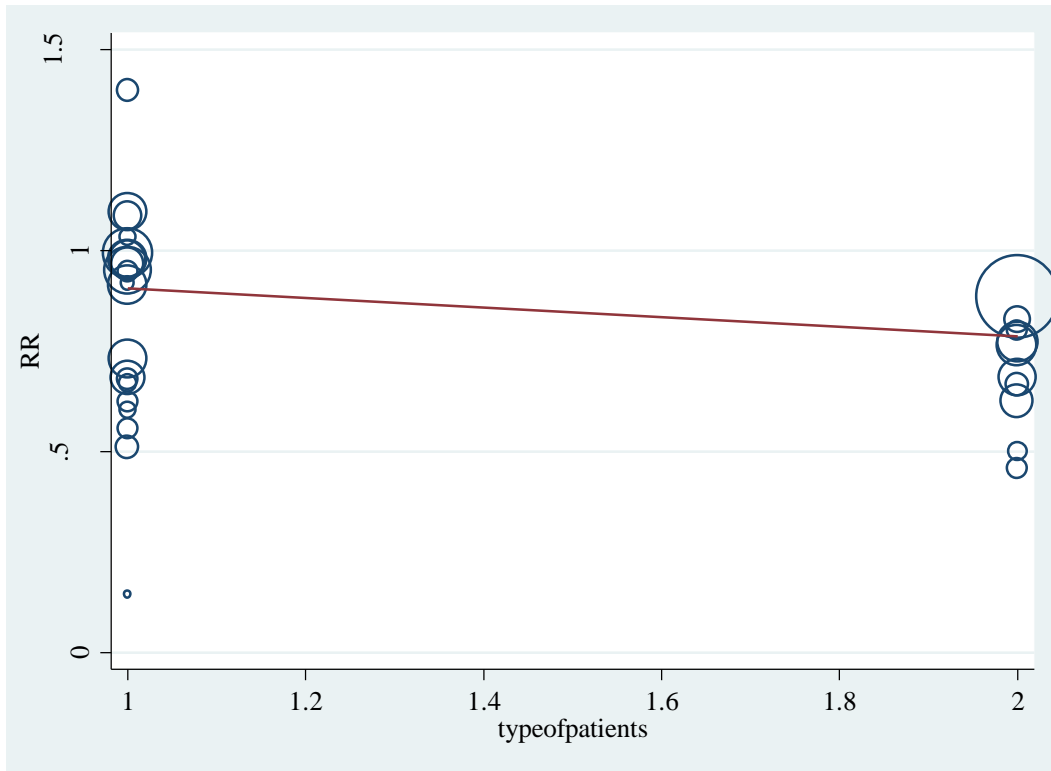

### Monitor

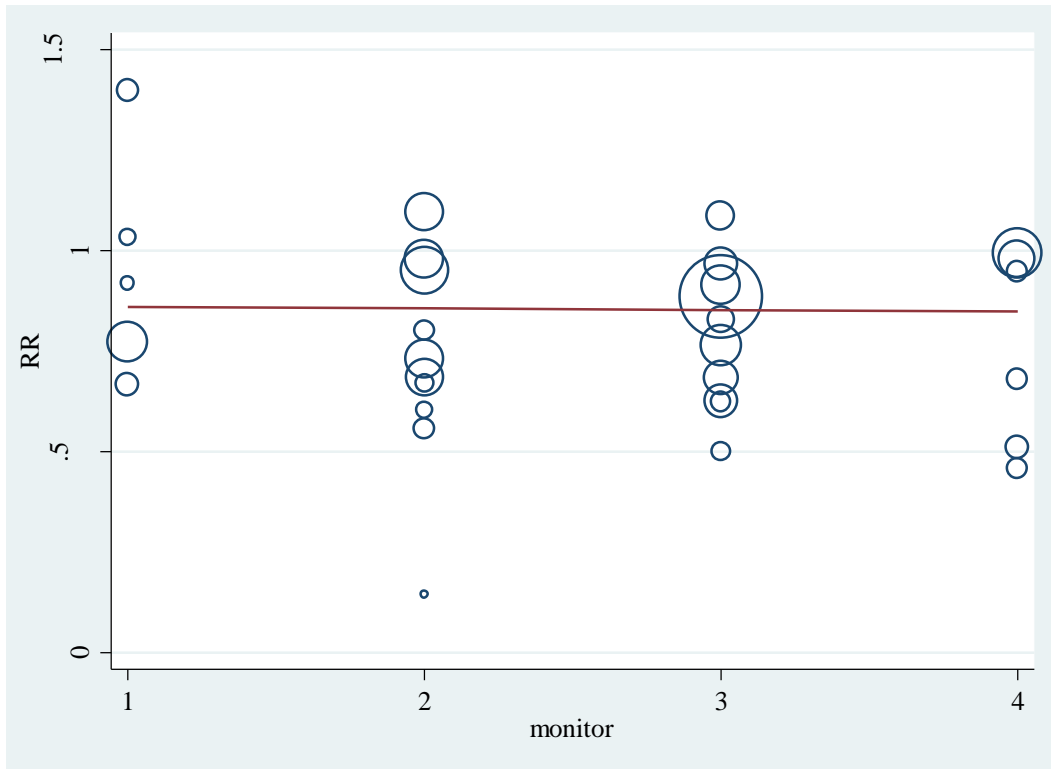



## ERP

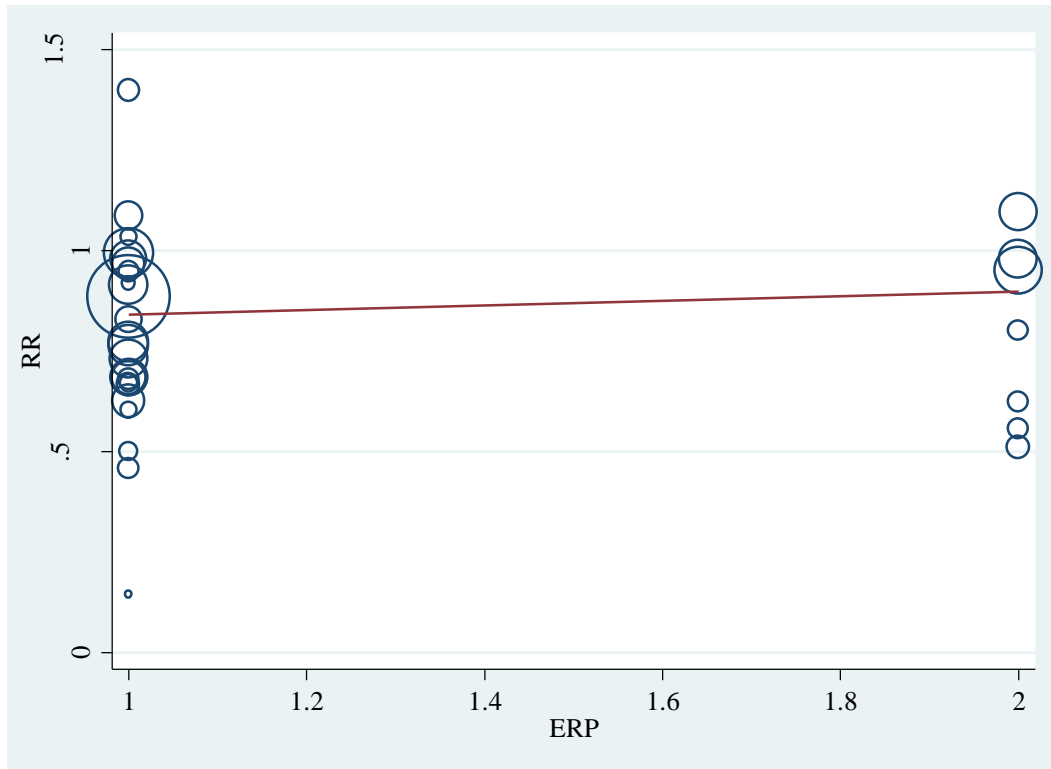

Additional file 8: Meta-regression analysis for overall complication rates.

RR=risk ratio; ERP=enhanced recovery programmes.
