# Supplementary material for: Effect of perioperative goal-directed hemodynamic therapy on postoperative recovery following major abdominal surgery—a systematic review and meta-analysis of randomized controlled trials
Source: Springer Nature journal article supplement (doi:10.1186/s13054-017-1728-8), 2017-06-09
Supplement: MOESM10 [file 12355648]

### A: Time to first flatus pass

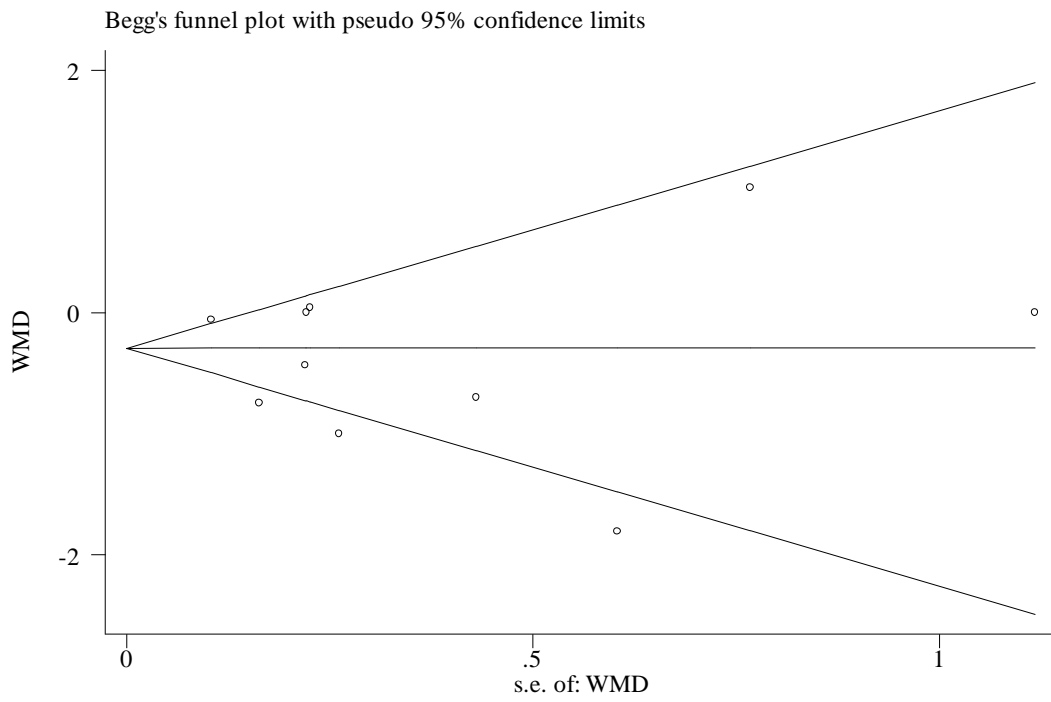

### B: Time to first bowel movement

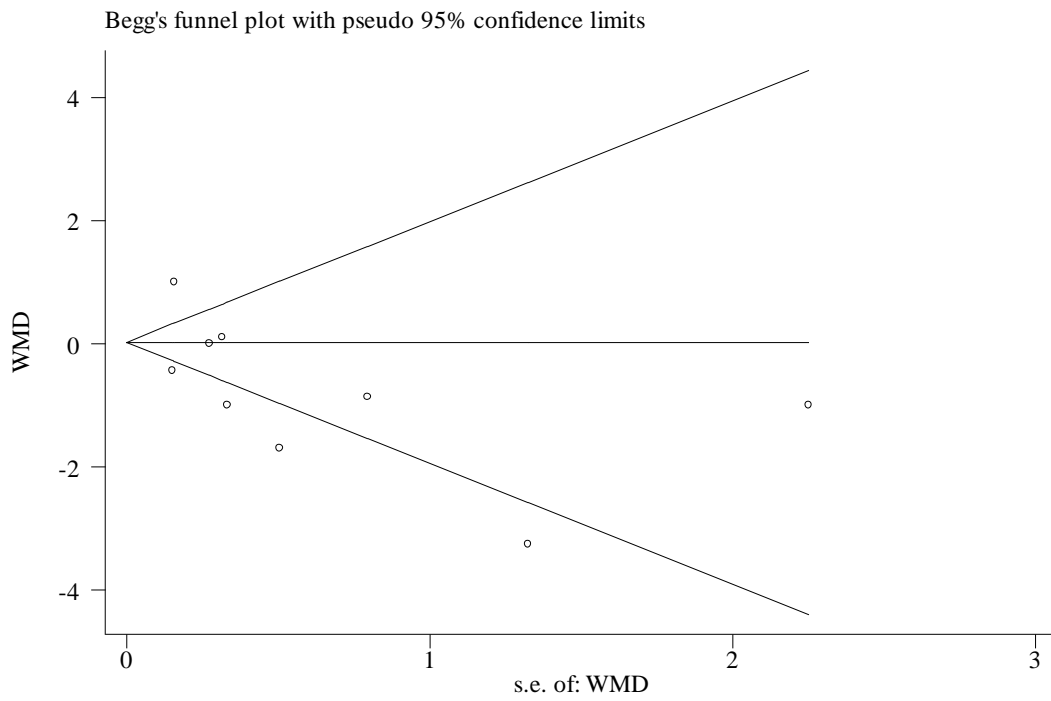

### C: Time to tolerate oral diet

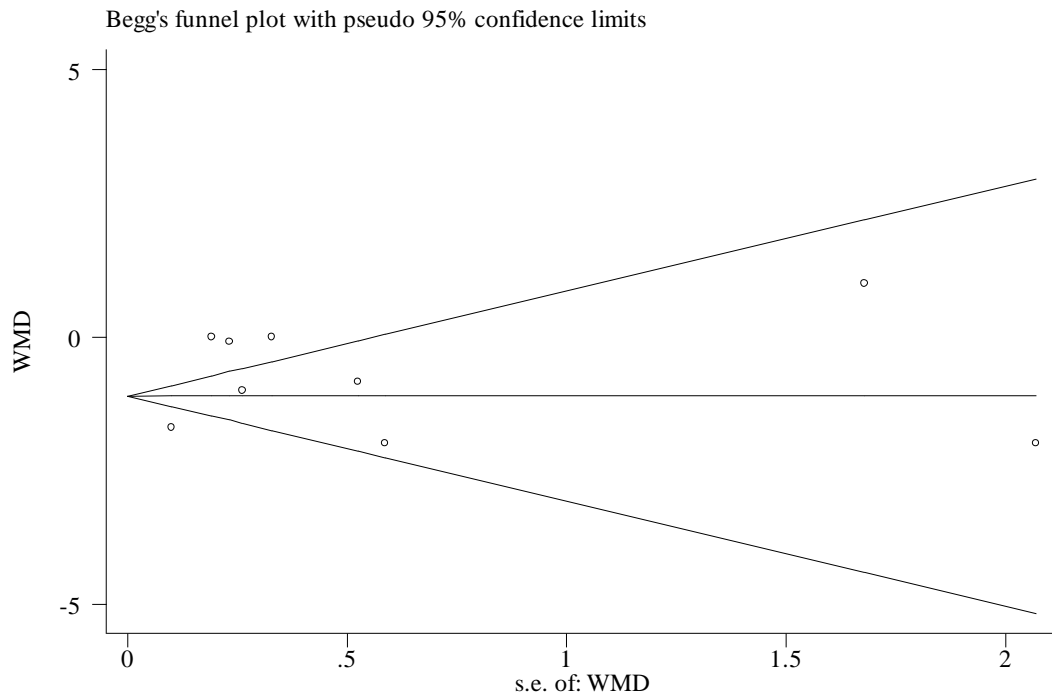

Additional file 10: Begg's publication funnel plots on time to first flatus pass (A), time to bowel movement (B), and time to tolerate oral diet (C). WMD: weighted mean differences.
